# Supplementary material for: Epigenetic Activation of TUSC3 Sensitizes Glioblastoma to Temozolomide Independent of MGMT Promoter Methylation Status
Source: MDPI journal article supplement (doi:10.3390/ijms242015179), 2023-10-14
Supplement: s1 [file s1]

**Figure S1**

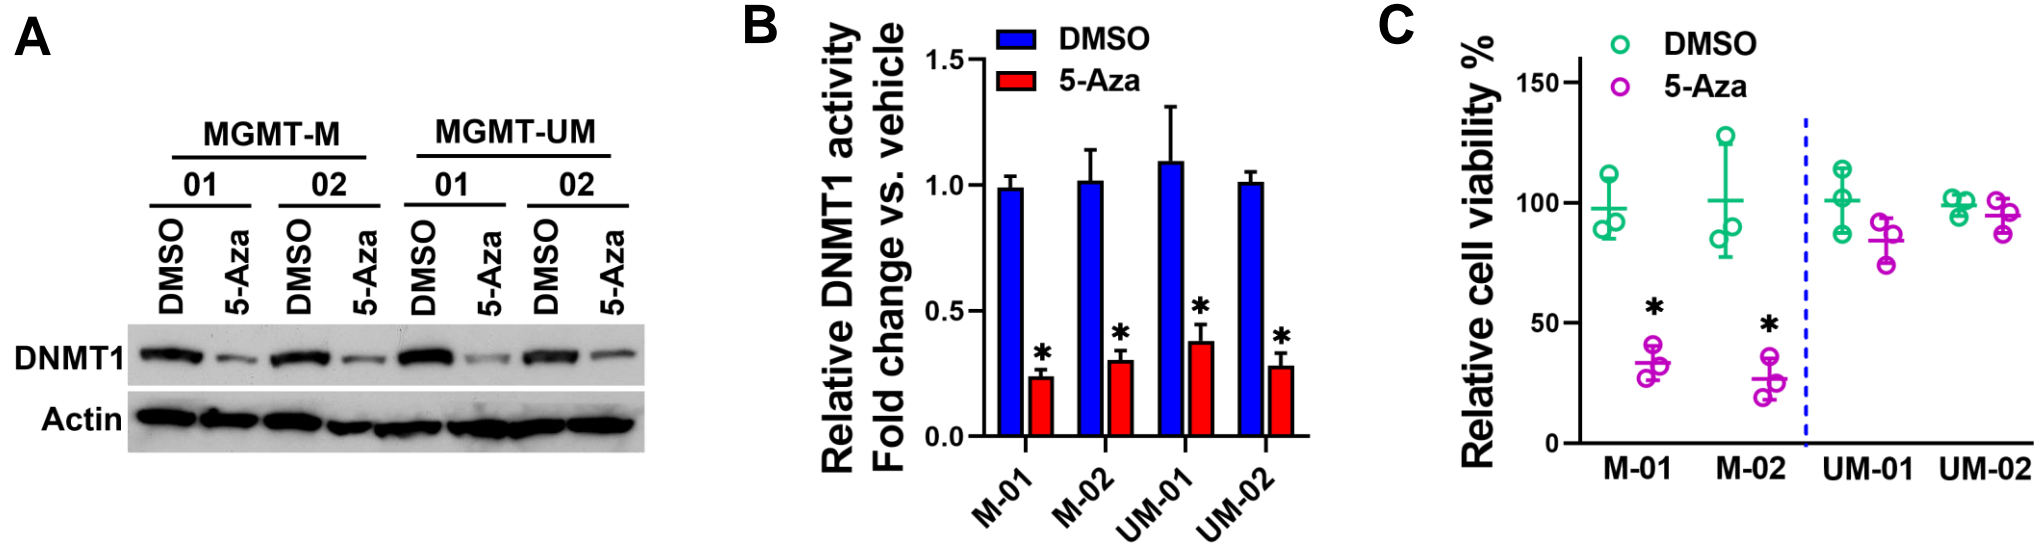

**Figure S1** (A) Immunoblotting of DNMT1 protein in MGMT-M and MGMT-UM GSCs.  $\beta$ -actin was used as loading control. (B) DNMT1 activity measurement in MGMT-M and MGMT-UM GSCs when treated with DMSO control and 5-Aza for 72 hours. (C) Relative cell viabilities of GSCs under 5-Aza or DMSO treatment in combination with TMZ for 72 hours. Data are presented as mean  $\pm$  SD.  $n=3$ ; \*,  $p<0.05$ .

**Figure S2**

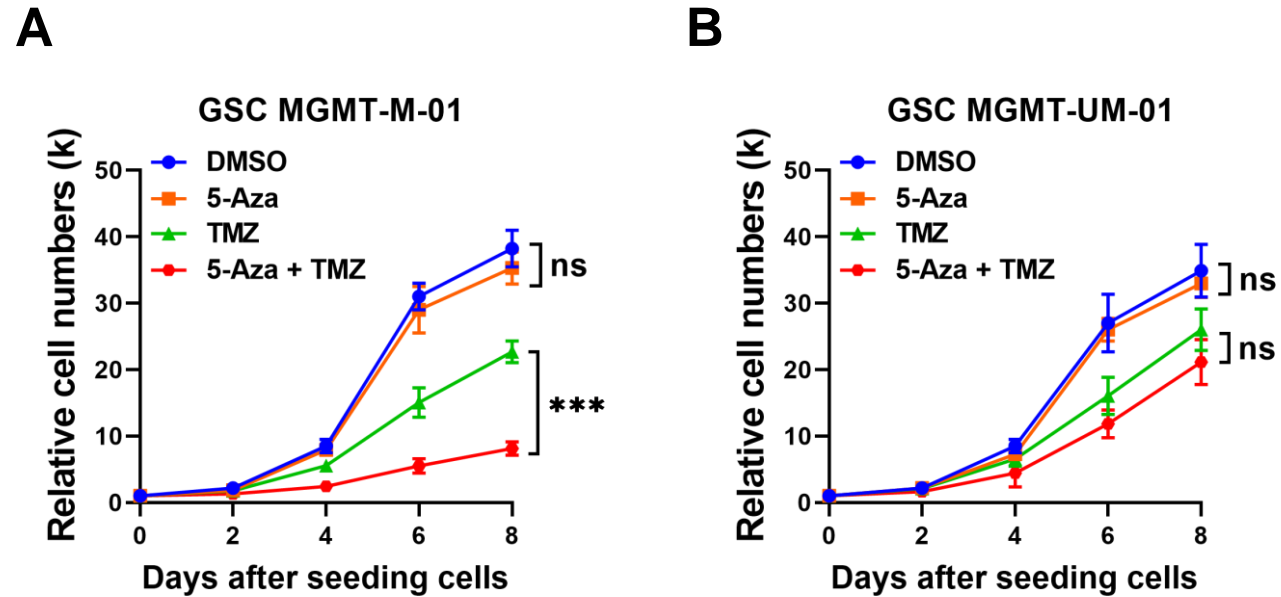

**Figure S2** Cell growth curves of MGMT-M (A) and MGMT-UM (B) GSCs, under 4 groups treatment indicated respectively. Data are presented as mean  $\pm$  SD. n=3; \*\*\*,  $p < 0.001$ ; ns, no significance.

**Figure S3**

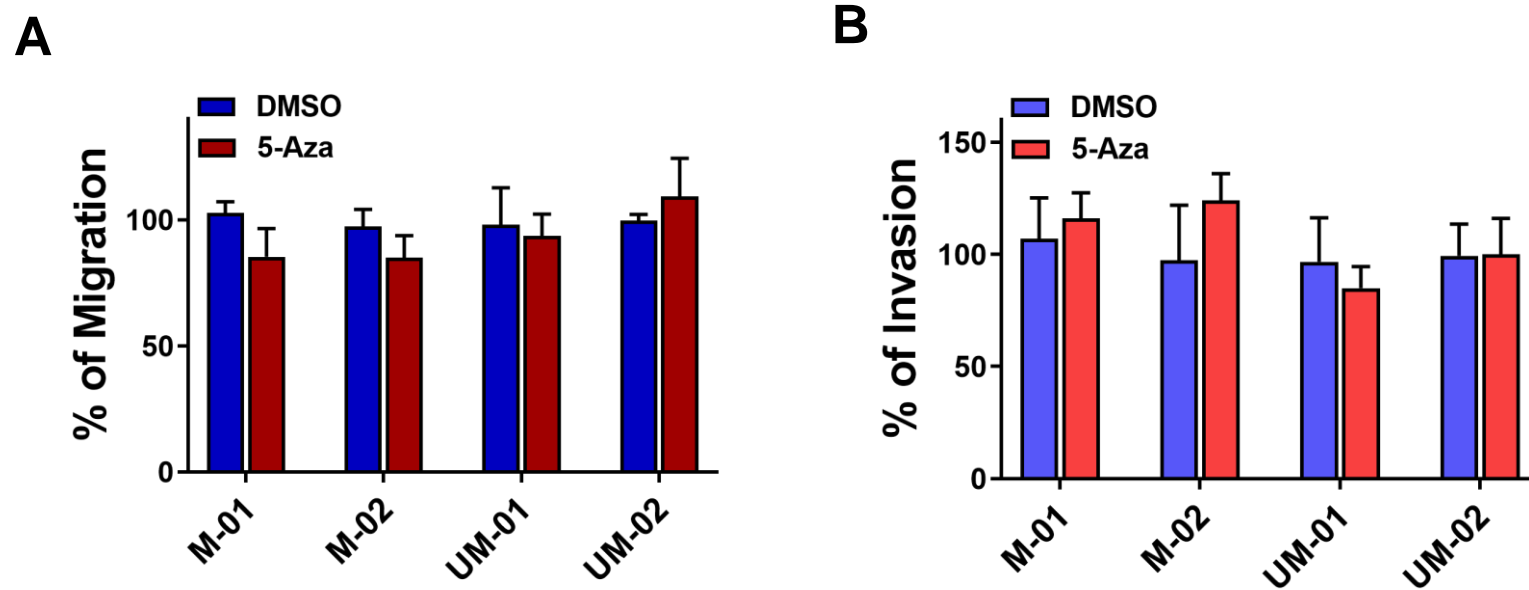

**Figure S3** (A-B) Trans-well migration and invasion assay of MGMT-M and MGMT-UM GSCs, DMSO control versus 5-Aza treatment. DMSO treated cell numbers were normalized as 100%. Data are presented as mean  $\pm$  SD. n=3.

**Figure S4**

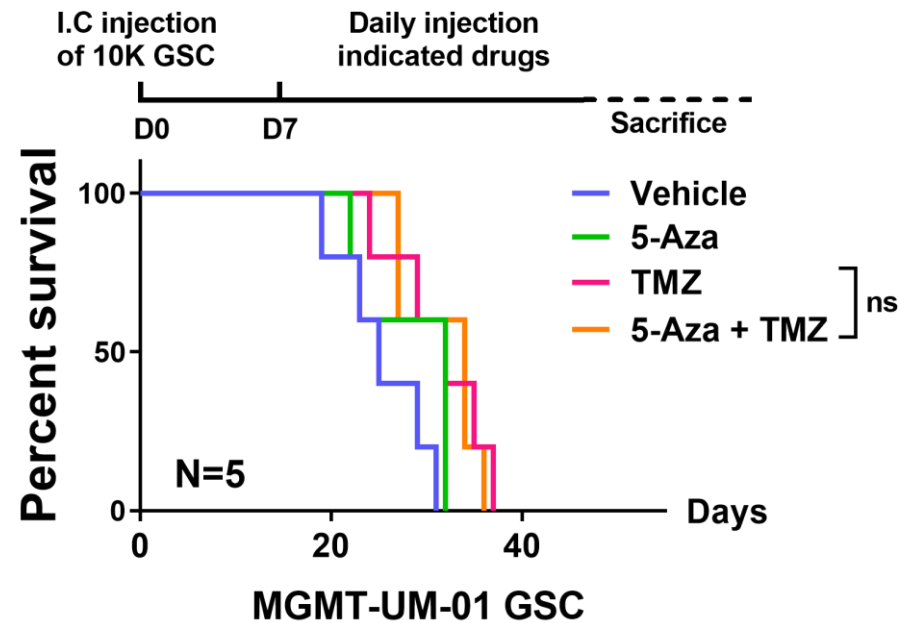

**Figure S4** Kaplan-Meier survival curves of immunocompromised mice bearing MGMT-UM GSCs treated with Vehicle, 5-Aza only, TMZ only or 5-Aza plus TMZ. The p values were calculated by Mantel-Cox log-rank test. ns, no significance. I.C., intracranial.

**Figure S5**

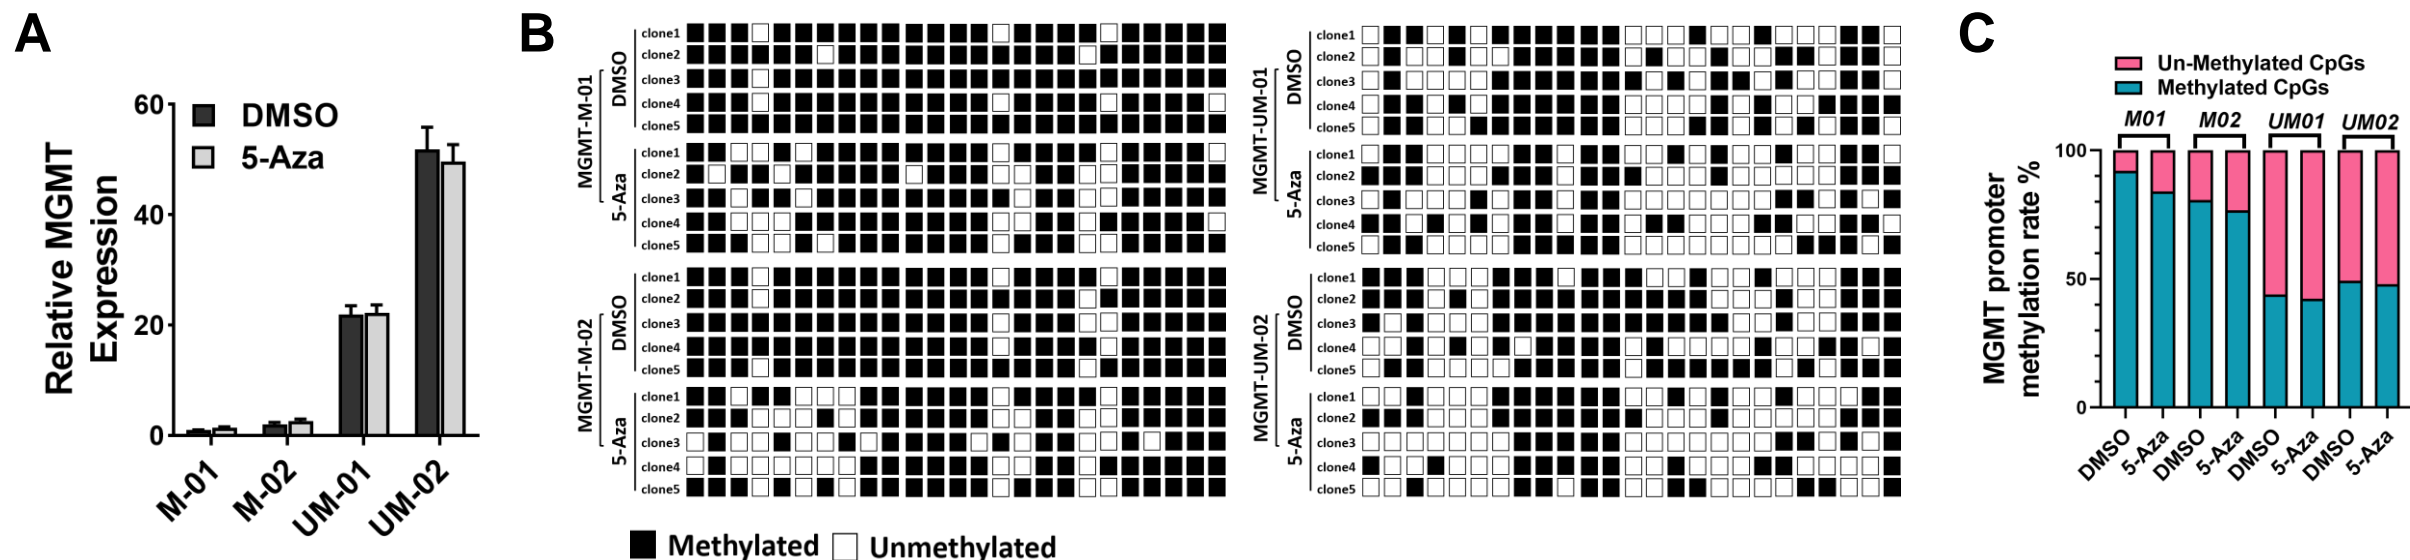

**Figure S5** (A) MGMT mRNA expression examined by qPCR in MGMT-M and MGMT-UM GSCs treated with DMSO or 5-Aza (72 hours). Data are presented as mean  $\pm$  SD. (B) Bisulfite sequencing was performed of human MGMT promoter in MGMT-M and MGMT-UM GSCs. Each square represents one CpG-dinucleotide. Black square indicates methylated CpG-dinucleotide and white square indicated unmethylated CpG-dinucleotide. (C) Quantification of indicated bisulfite sequencing result in (B).

**Figure S6**

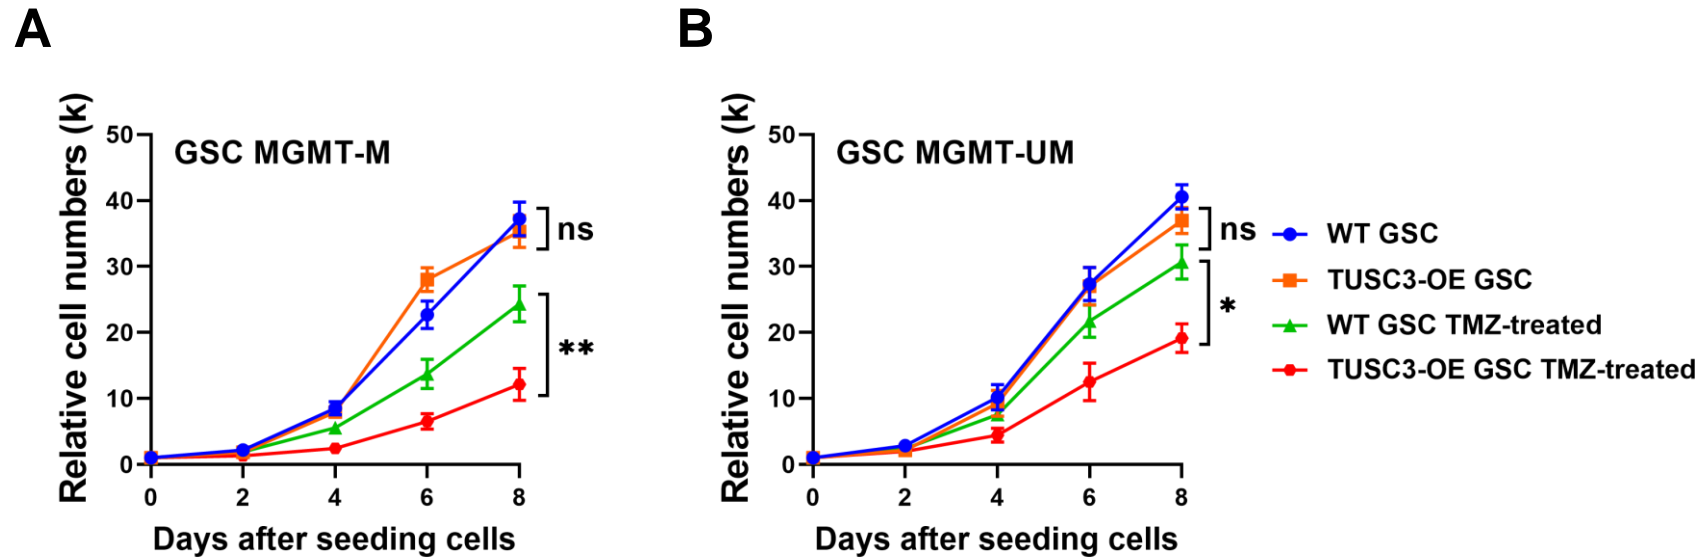

**Figure S6** Cell growth curves of MGMT-M (A) and MGMT-UM (B) GSCs. 4 groups treatment indicated respectively including: wild-type GSC (DMSO treated), TUSC3-OE GSC (DMSO treated), wild-type GSC with TMZ treatment, and TUSC3-OE GSC with TMZ treatment. Data are presented as mean  $\pm$  SD. n=3; \*, p<0.05; \*\*, p<0.01; ns, no significance.

**Figure S7**

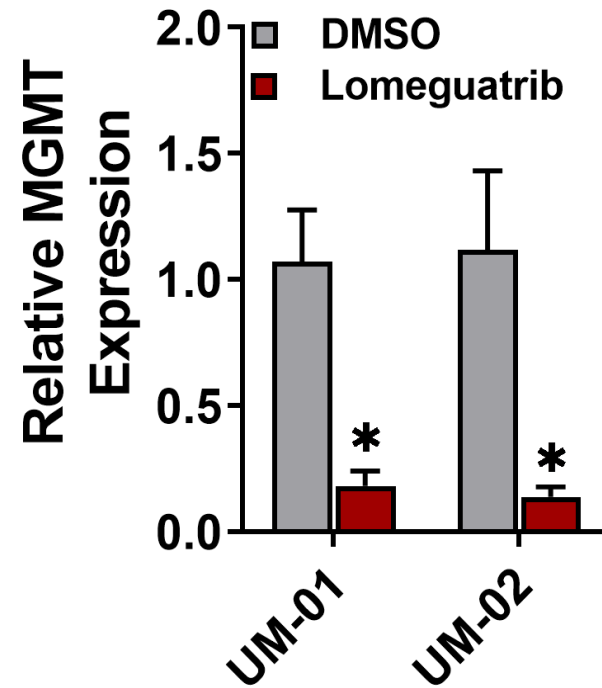

**Figure S7** Inhibition efficiency of MGMT by Lomeguatrib examined by qPCR in MGMT-UM GSCs. Data are presented as mean  $\pm$  SD. n=3; \*, p<0.05.

**Figure S8**

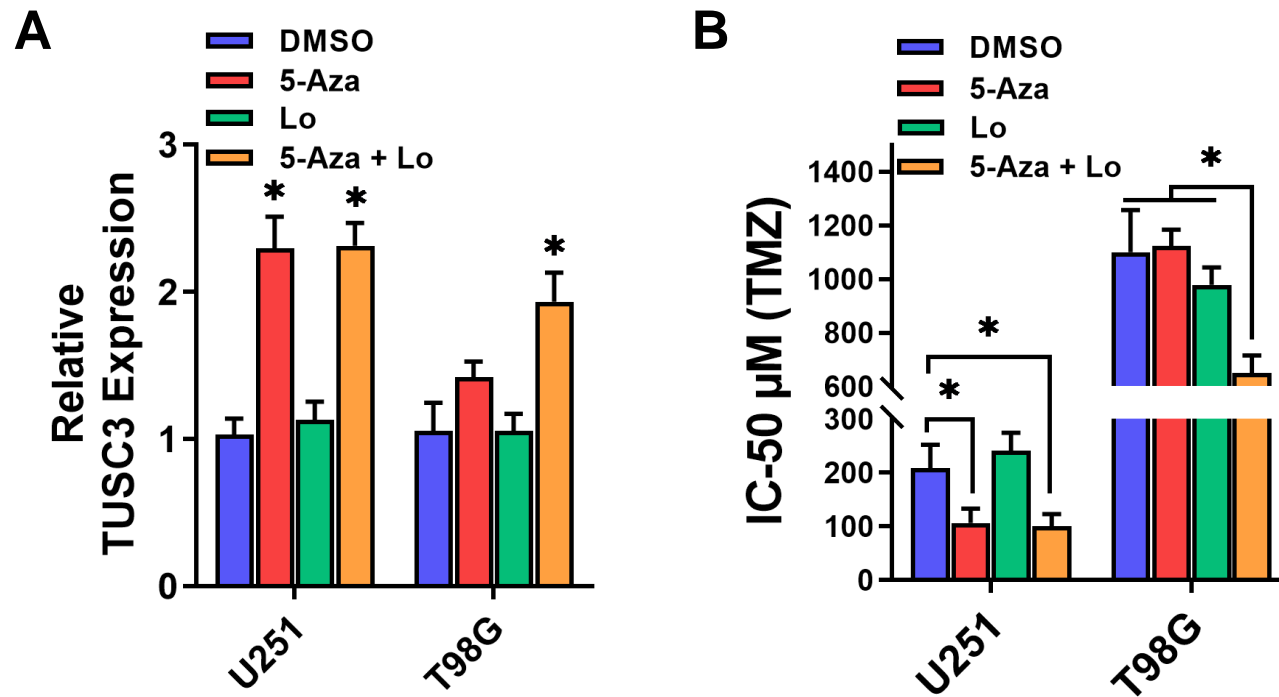

**Figure S8** (A) mRNA expression of TUSC3 was measured by qPCR in U251 and T98G GBM cells with indicated single or combination treatment. (B) TMZ IC-50 alteration during indicated treatment (4 treatment groups) in U251 and T98G GBM cells. All cells were treated for 72 hours. 5-Aza, 20  $\mu$ M; Lomeguatrib, 20  $\mu$ M. Lo, Lomeguatrib. Data are presented as mean  $\pm$  SD. n=3; \*, p<0.05.



**Figure S9**

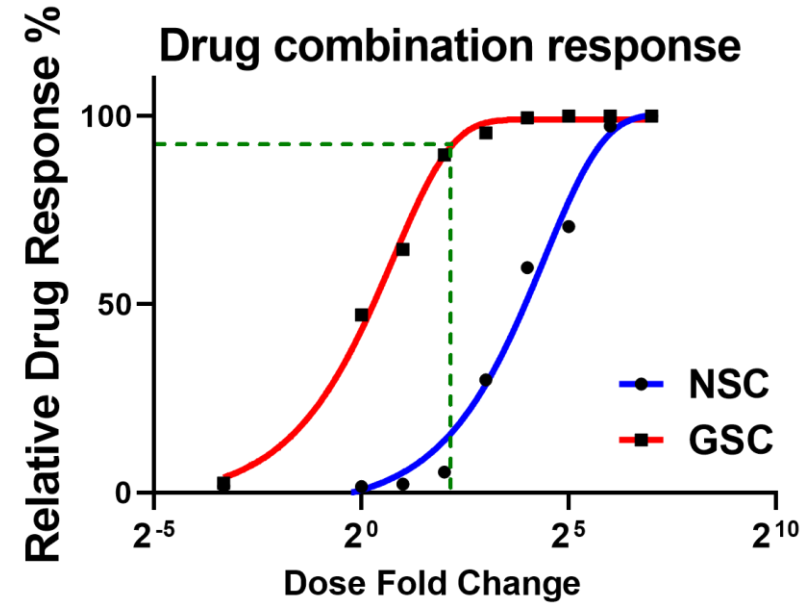

**Figure S9** Dose-response curve of 5-Aza, TMZ and Lomeguatrib three-drug combination in MGMT-UM GSC and NSC for 72 hours with a serial of 2-fold dose escalation. Initial doses: 5-Aza, 5  $\mu$ M; TMZ, 50  $\mu$ M; Lomeguatrib, 5  $\mu$ M.
